# Supplementary material
Source: PubMed Central journal article supplement (PMC6865048)
Supplement: NIHMS1058661-supplement-Supplement.pdf [file NIHMS1058661-supplement-Supplement.pdf]

## Supplementary Figure 1

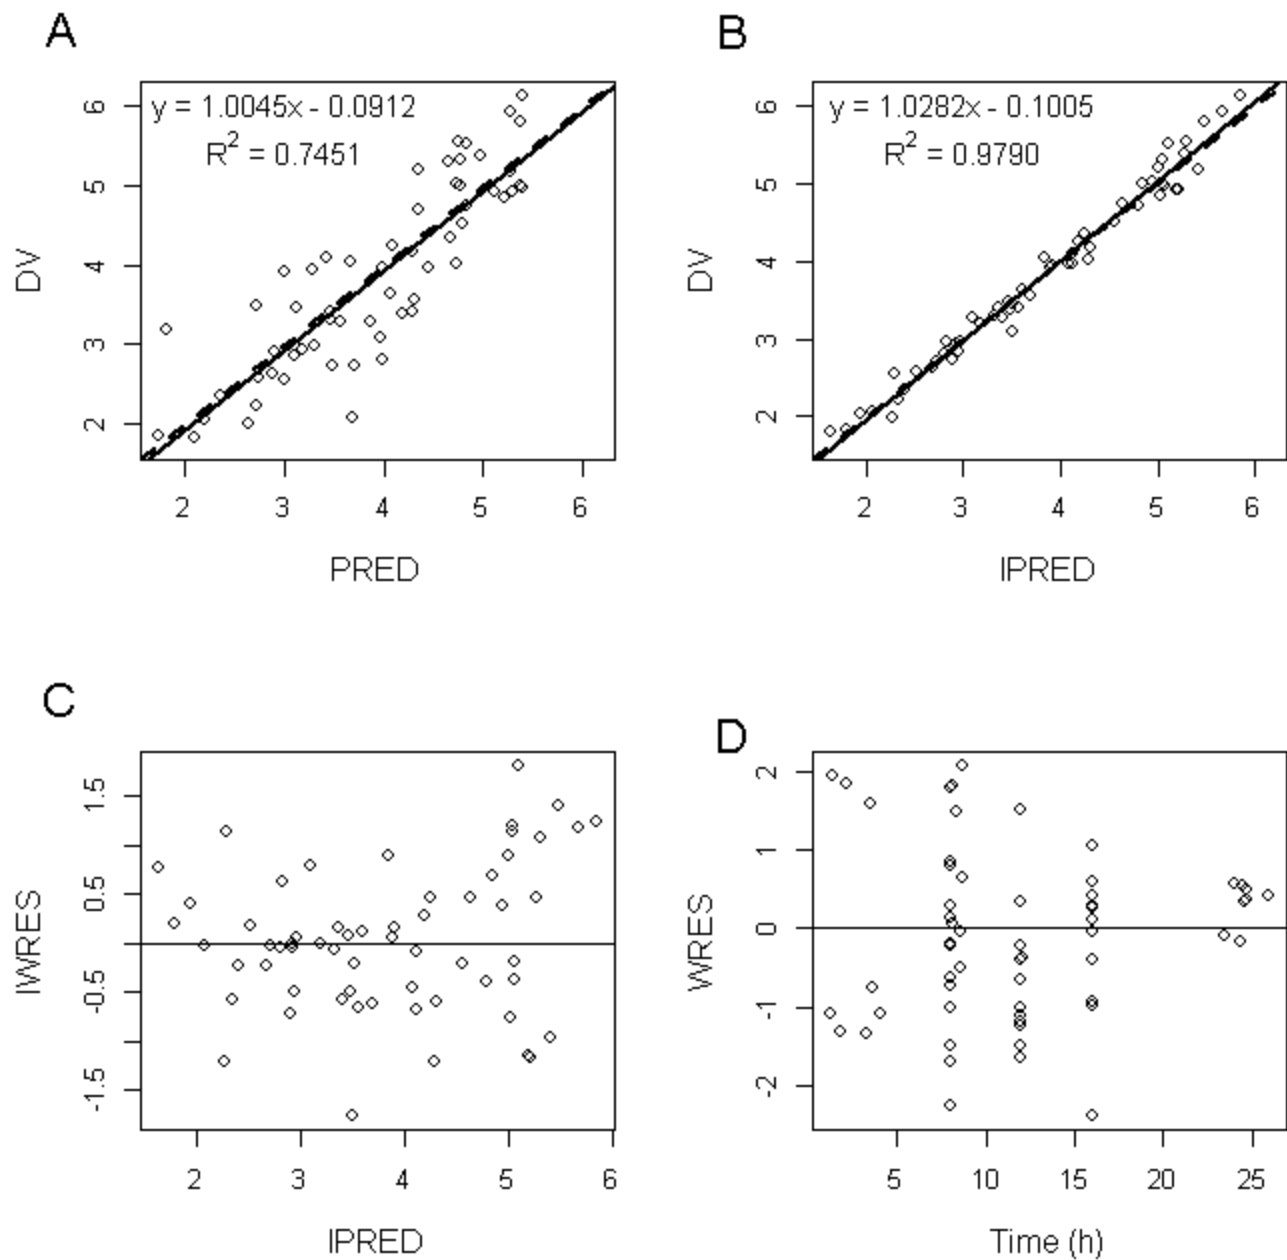

## Supplementary Table 1

| <b>Gene</b> | <b>Regions of Gene Covered</b> | <b>% Coverage of Gene</b> |
|-------------|--------------------------------|---------------------------|
| ABCB1       | 34                             | 98.78                     |
| ABCC9       | 43                             | 91.98                     |
| ATRX        | 38                             | 100.00                    |
| CDKN2A      | 9                              | 100.00                    |
| CDKN2B      | 2                              | 100.00                    |
| CDKN2C      | 3                              | 100.00                    |
| CHEK1       | 13                             | 98.87                     |
| CHEK2       | 22                             | 81.10                     |
| COL1A2      | 40                             | 98.82                     |
| EGFR        | 34                             | 99.29                     |
| IDH1        | 12                             | 95.59                     |
| IDH2        | 10                             | 97.14                     |
| KEL         | 18                             | 98.96                     |
| MDM2        | 14                             | 90.60                     |
| NF1         | 63                             | 99.87                     |
| PDGFRA      | 28                             | 96.72                     |
| PIK3CA      | 22                             | 100.00                    |
| PIK3R1      | 17                             | 100.00                    |
| PTEN        | 10                             | 99.12                     |
| RB1         | 26                             | 100.00                    |
| SPTA1       | 53                             | 99.87                     |
| STAG2       | 41                             | 98.05                     |
| TCHH        | 3                              | 93.08                     |
| TP53        | 12                             | 89.92                     |
| WEE1        | 11                             | 99.78                     |

## Supplementary Table 2

| Trial Arm       | Drug Dose | Patient # | Cell Cycle Checkpoint Genes |      |                  |                  |         | RTK Signaling Pathway Genes |        |                  |                     |                  | IDH1             |        |
|-----------------|-----------|-----------|-----------------------------|------|------------------|------------------|---------|-----------------------------|--------|------------------|---------------------|------------------|------------------|--------|
|                 |           |           | TP53                        | MDM2 | RB1              | ATR              | Wee1    | EGFR                        | PDGFRA | NF1              | PTEN                | PIK3R1           |                  | PIK3CA |
| Dose Escalation | 100 mg    | 1         |                             |      |                  |                  |         | C>G <sup>a</sup>            |        |                  | G132D               |                  |                  |        |
|                 |           | 2         |                             |      |                  | T1582fs          |         | C>G <sup>a</sup>            |        |                  |                     |                  |                  |        |
|                 |           | 3         |                             |      |                  |                  |         | S473C                       |        |                  | Del GT <sup>b</sup> |                  |                  |        |
|                 |           | 4         |                             |      |                  |                  |         |                             |        |                  | T>A <sup>a</sup>    |                  |                  |        |
|                 | 200 mg    | 5         |                             |      |                  |                  |         |                             |        |                  |                     |                  |                  |        |
|                 |           | 6         | V143M                       |      |                  | Y805fs           |         |                             |        |                  |                     |                  |                  |        |
|                 |           | 7         |                             |      |                  |                  |         | R108K,<br>G312W             |        |                  | R233*               |                  |                  |        |
|                 |           | 8         |                             |      | G>A <sup>c</sup> |                  |         |                             |        | G>C <sup>b</sup> | P246L               |                  | R88Q             |        |
|                 | 400 mg    | 9         | A276P,<br>K139N             |      |                  | A>G <sup>b</sup> |         |                             |        | D606G            |                     |                  |                  | R132H  |
|                 |           | 10        |                             |      |                  |                  | R1302fs |                             | E711K  |                  |                     |                  |                  |        |
|                 |           | 11        |                             |      |                  |                  |         |                             |        |                  |                     |                  |                  |        |
|                 |           | 12        |                             |      |                  |                  |         |                             |        |                  |                     |                  |                  |        |
| Time Escalation | 400 mg    | 13        |                             |      |                  |                  |         |                             |        |                  |                     |                  |                  |        |
|                 |           | 14        | L130F                       |      |                  |                  |         |                             |        |                  |                     |                  |                  |        |
|                 |           | 15        |                             |      |                  |                  |         |                             |        |                  |                     |                  |                  |        |
|                 | 400 mg    | 16        |                             |      |                  |                  |         |                             |        | N419K            | F1247fs             | T>A <sup>a</sup> |                  |        |
|                 |           | 17        | V272M                       |      |                  |                  |         |                             |        |                  | A>T <sup>b</sup>    |                  | C>T <sup>b</sup> |        |
|                 |           | 18        |                             |      |                  | T>C <sup>c</sup> |         |                             |        |                  |                     |                  |                  | N1044K |
|                 |           | 19        |                             |      |                  |                  |         |                             |        |                  |                     |                  |                  |        |
|                 |           | 20        |                             |      |                  |                  |         |                             |        |                  |                     |                  | Q579fs           |        |

<sup>a</sup> Variant in untranslated region (UTR), <sup>b</sup> Variant leads to splice site loss, <sup>c</sup> Variant in intronic region, \* Variant results in premature stop codon
